# Supplementary material for: Schistosoma mansoni venom allergen-like protein 6 (SmVAL6) maintains tegumental barrier function
Source: PubMed Central journal article supplement (PMC7957364; doi:10.1016/j.ijpara.2020.09.004), 2021-03

### Females

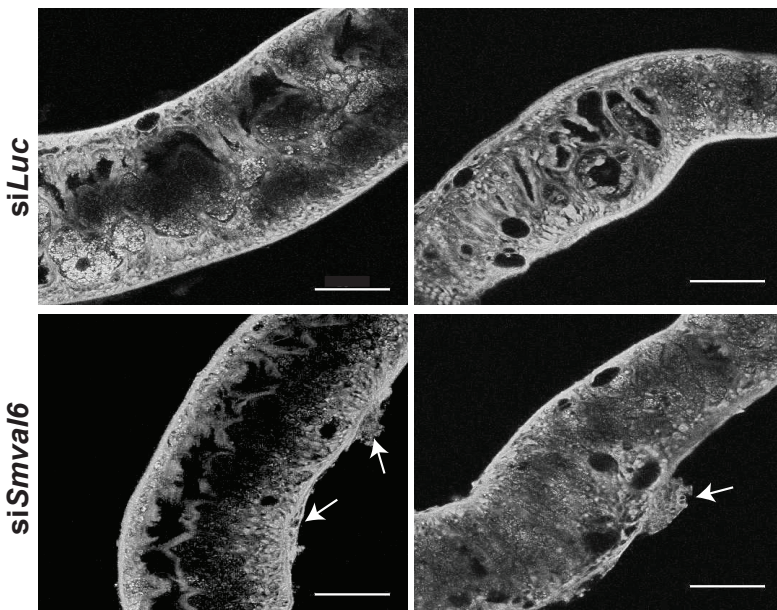

- Level 3-4 (Considerable to severe damage)
- Level 2-3 (Localised to considerable damage)
- Level 1 (Minimal damage)
- Level 0 (No damage)

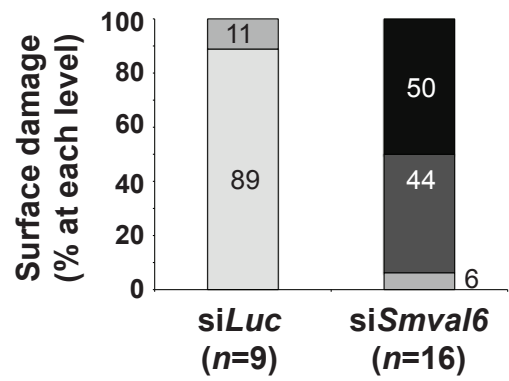

Supplement: mmc2.pdf [file mmc2.pdf]
