# Supplementary material for: Schistosoma mansoni venom allergen-like protein 6 (SmVAL6) maintains tegumental barrier function
Source: PubMed Central journal article supplement (PMC7957364; doi:10.1016/j.ijpara.2020.09.004), 2021-03

**A****Female**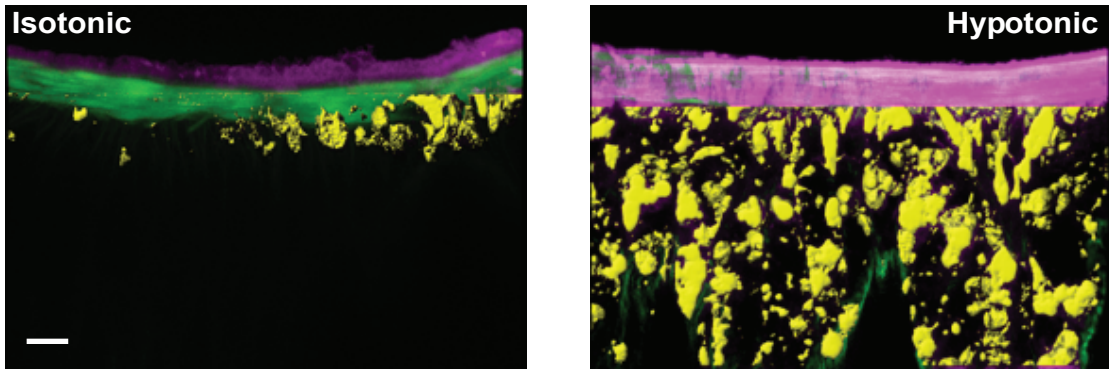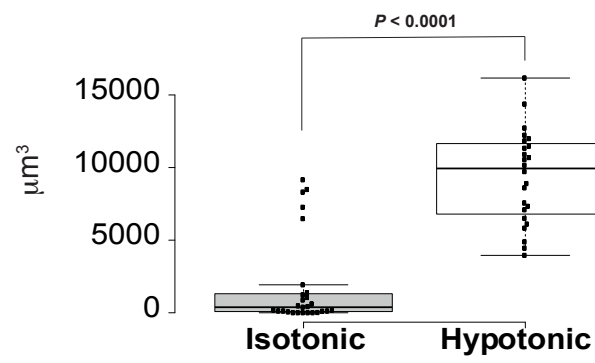**B****Male**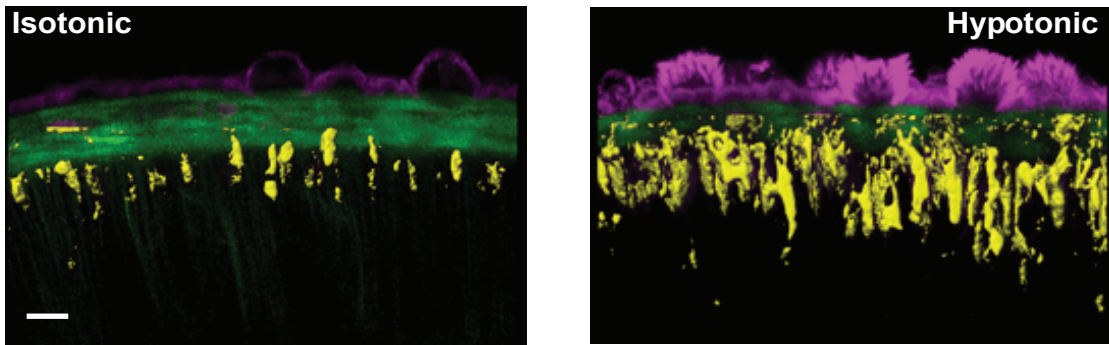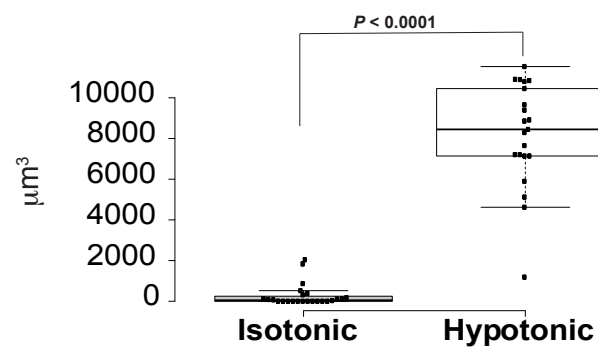

Supplement: mmc3.pdf [file mmc3.pdf]
